# Supplementary material for: Inter-individual characteristics on basic taste recognition thresholds in a college-aged cohort: potential predictive factors
Source: Royal Society of Chemistry journal article supplement (doi:10.1039/d2fo02867k), 2022-01-01
Supplement: d2fo02867k1.pdf [file d2fo02867k1.pdf]

## **Inter-individual characteristics on basic taste recognition thresholds in a college-aged cohort: potential predictive factors**

Marta Trius-Soler <sup>a,b,c</sup>, Emily P. Laveriano-Santos <sup>a,b,c</sup>, Clara Góngora <sup>a</sup>, and Juan J. Moreno <sup>a,b,c†</sup>

<sup>a</sup> Department of Nutrition, Food Sciences and Gastronomy, XIA School of Pharmacy and Food Sciences, University of Barcelona, 08028 Barcelona, Spain.

<sup>b</sup> INSA-UB, Nutrition and Food Safety Research Institute, University of Barcelona, 08921 Santa Coloma de Gramanet, Spain.

<sup>c</sup> CIBER Fisiopatología de la Obesidad y Nutrición (CIBEROBN), Instituto de Salud Carlos III, 28029 Madrid, Spain.

Email address: mtrius@ub.edu (M.T.-S.); emily.laveriano@ub.edu (E.P.L.-S.); c.gongora4@gmail.com (C.G.); jjmoreno@ub.edu (J.J.M).

\*Correspondence author: E-mail address: jjmoreno@ub.edu; Tel: 934035818.

**Supplementary Table 1.** Eigenvalues and variance explained by the extracted factors (PCA)

| <sup>1</sup> Factor | Eigenvalue | Variance explained (%) | Cumulative variance explained (%) |
|---------------------|------------|------------------------|-----------------------------------|
| All participants    |            |                        |                                   |
| <i>Factor 1</i>     | 2.226      | 20.2                   | 20.2                              |
| <i>Factor 2</i>     | 1.560      | 14.2                   | 34.4                              |
| <i>Factor 3</i>     | 1.387      | 12.6                   | 47.0                              |
| <i>Factor 4</i>     | 1.143      | 10.4                   | 57.4                              |
| Females             |            |                        |                                   |
| <i>Factor 1</i>     | 2.478      | 24.8                   | 24.8                              |
| <i>Factor 2</i>     | 1.629      | 16.3                   | 41.1                              |
| <i>Factor 3</i>     | 1.129      | 11.3                   | 52.4                              |
| <i>Factor 4</i>     | 1.026      | 10.3                   | 62.6                              |
| Males               |            |                        |                                   |
| <i>Factor 1</i>     | 2.036      | 20.4                   | 20.4                              |
| <i>Factor 2</i>     | 1.405      | 14.1                   | 34.3                              |
| <i>Factor 3</i>     | 1.256      | 12.6                   | 47.0                              |
| <i>Factor 4</i>     | 1.132      | 11.3                   | 58.3                              |
| <i>Factor 5</i>     | 1.069      | 10.7                   | 69.0                              |

<sup>1</sup>Factors reported if the eigenvalue was >1

**Supplementary Table 2.** Descriptor components of the extracted factors (PCA)

| <b>Factor</b>           | <b><sup>1</sup>Components directly correlated (coefficient)</b>                                                                                                                   | <b><sup>1</sup>Components inversely correlated (coefficient)</b> |
|-------------------------|-----------------------------------------------------------------------------------------------------------------------------------------------------------------------------------|------------------------------------------------------------------|
| <b>All participants</b> |                                                                                                                                                                                   |                                                                  |
| <i>Factor 1</i>         | Any family antecedents (0.932); family antecedents of hypertension (0.716); family antecedents of diabetes (0.681); family antecedents of overweight/obesity (0.569)              |                                                                  |
| <i>Factor 2</i>         | Rhinitis (0.630); sinusitis (0.664); smoking (0.414); missing teeth (0.404); BMI (0.378)                                                                                          | Female (-0.411)                                                  |
| <i>Factor 3</i>         | Female (0.658); sinusitis (0.460); rhinitis (0.455)                                                                                                                               | BMI (-0.649)                                                     |
| <i>Factor 4</i>         | Dental cavities (0.716); missing teeth (0.608)                                                                                                                                    |                                                                  |
| <b>Females</b>          |                                                                                                                                                                                   |                                                                  |
| <i>Factor 1</i>         | Any family antecedents (0.921); family antecedents of diabetes (0.739); family antecedents of hypertension (0.726); family antecedents of overweight/obesity (0.615); BMI (0.347) |                                                                  |
| <i>Factor 2</i>         | Rhinitis (0.839); sinusitis (0.833)                                                                                                                                               |                                                                  |
| <i>Factor 3</i>         | Missing teeth (0.727); dental cavities (0.630)                                                                                                                                    |                                                                  |
| <i>Factor 4</i>         |                                                                                                                                                                                   | Smoking (-0.878)                                                 |
| <b>Males</b>            |                                                                                                                                                                                   |                                                                  |
| <i>Factor 1</i>         | Any family antecedents (0.905); family antecedents of hypertension (0.723); family antecedents of diabetes (0.550); family antecedents of overweight/obesity (0.343)              | BMI (-0.328)                                                     |
| <i>Factor 2</i>         | Sinusitis (0.683); Rhinitis (0.521); smoking (0.502); missing teeth (0.465); dental cavities (0.309)                                                                              |                                                                  |
| <i>Factor 3</i>         | BMI (0.699); family antecedents of overweight/obesity (0.660)                                                                                                                     | Sinusitis (-0.370)                                               |
| <i>Factor 4</i>         | Missing teeth (0.598); rhinitis (0.443)                                                                                                                                           | Smoking (-0.663)                                                 |
| <i>Factor 5</i>         | Dental cavities (0.841)                                                                                                                                                           | Rhinitis (-0.392); BMI (-0.302)                                  |

<sup>1</sup>Components reported if the coefficient was >0.3

**Supplementary Table 3.** Influence of sex on tastant recognition threshold scores

|                               | <b>Females</b> | <b>Males</b>  | <b>p-value</b> |
|-------------------------------|----------------|---------------|----------------|
| Sucrose, mM                   | 5.2 ± 1.2      | 4.9 ± 1.5     | <b>0.013</b>   |
| MSG, mM                       | 2.7 ± 0.9      | 2.7 ± 1.0     | 0.757          |
| NaCl, mM                      | 4.5 ± 0.9      | 4.5 ± 1.0     | 0.501          |
| Citric acid <sup>1</sup> , mM | 3.4 ± 1.1      | 3.2 ± 1.3     | 0.577          |
| PTC, μM                       | 2.7 ± 1.6      | 2.8 ± 1.7     | 0.544          |
| Quinine, μM                   | 3.0 ± 1.2      | 3.1 ± 1.3     | 0.557          |
| Sinigrin, μM                  | 3.2 ± 1.0      | 3.0 ± 1.1     | 0.357          |
| TTS                           | 0.460 ± 0.119  | 0.455 ± 0.155 | 0.748          |

MSG: monosodium glutamate; NaCl: sodium chloride; PTC: phenylthiocarbamide; TTS: total taste score.

Tastant recognition thresholds are expressed as mean ± standard deviation (SD). The Mann-Whitney U test was applied for equal distribution variances. <sup>1</sup>The Median test was used for non-equal distribution variances.
